# Supplementary material
Source: Royal Society of Chemistry journal article supplement (doi:10.1039/d6ay00228e)
Supplement: d6ay00228e1.pdf [file d6ay00228e1.pdf]

## Supporting Information

### **Integration of a Screening-Guided Near-Infrared Aptasensor into a Portable Platform for Quantitative On-Site Detection of N<sup>1</sup>-Methyladenosine**

Qi Pang<sup>a</sup>, Dandan Zhang<sup>b</sup>, Ruilin Ma<sup>d</sup>, Wuduo Zhao<sup>a,b</sup>, Xinyue Cao<sup>a</sup>, Zhongyang Huang<sup>b</sup>, Tuanjie Huang<sup>c\*</sup>, and Jiaheng Zhang<sup>a,b\*</sup>

<sup>a</sup> School of Ecology and Environment, Zhengzhou University, Zhengzhou 450001, China

<sup>b</sup> College of Chemistry, Zhengzhou University, Zhengzhou 450001, China

<sup>c</sup> Department of Clinical Laboratory, The First Affiliated Hospital of Zhengzhou University, Zhengzhou, 450001, China

<sup>d</sup> Hydrology and Water Resources Monitoring and Forecasting Center of Henan Province 450001, China

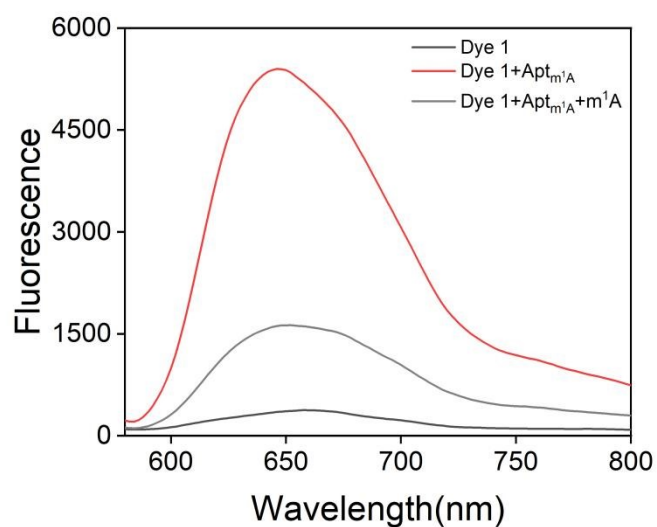

**Fig. S1** Fluorescence spectra of Crystal Violet (Ex: 540 nm / Em: 650 nm) binding to the Apt<sub>m<sup>1</sup>A</sub> and m<sup>1</sup>A competition in Tris buffer.

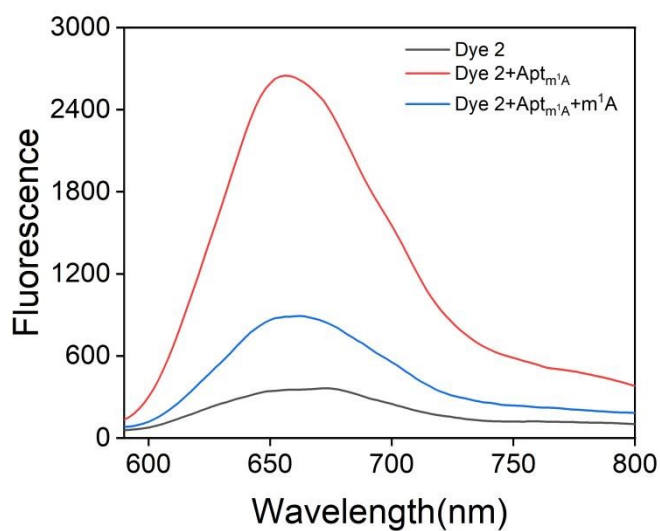

**Fig. S2** Fluorescence spectra of Ethyl Violet (Ex: 550 nm / Em: 650 nm) binding to the Apt<sub>m<sup>1</sup>A</sub> and m<sup>1</sup>A competition in Tris buffer.

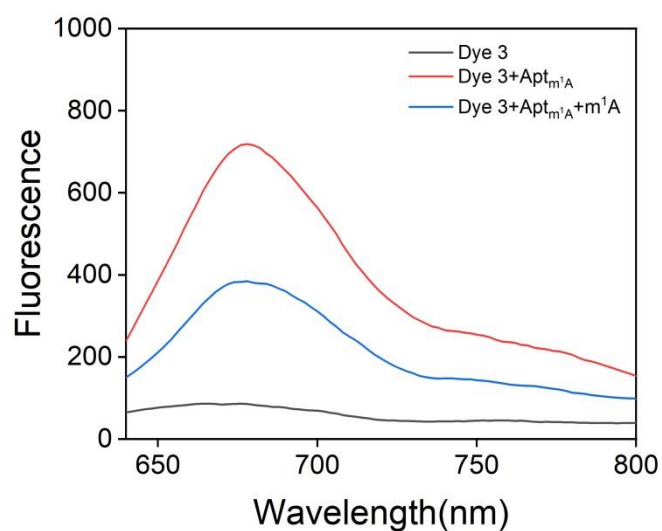

**Fig. S3** Fluorescence spectra of Methyl Green zinc chloride salt (Ex: 600 nm / Em: 670 nm) binding to the Apt<sub>m<sup>1</sup>A</sub> and m<sup>1</sup>A competition in Tris buffer.

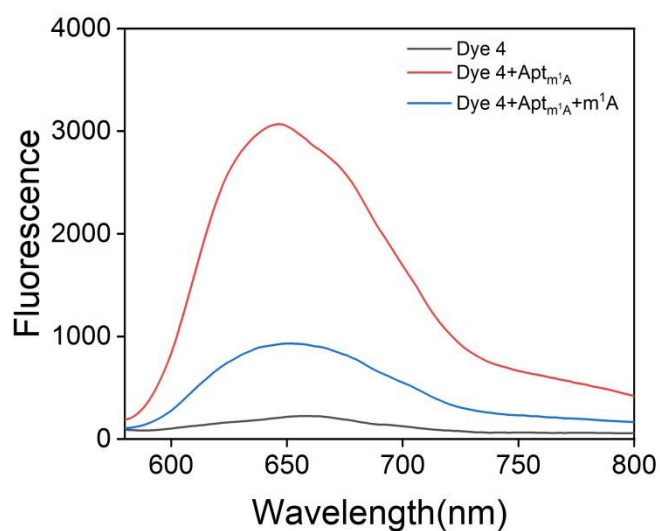

**Fig. S4** Fluorescence spectra of Solvent Violet 8 (Ex: 540 nm / Em: 630 nm) binding to the Apt<sub>m<sup>1</sup>A</sub> and m<sup>1</sup>A competition in Tris buffer.

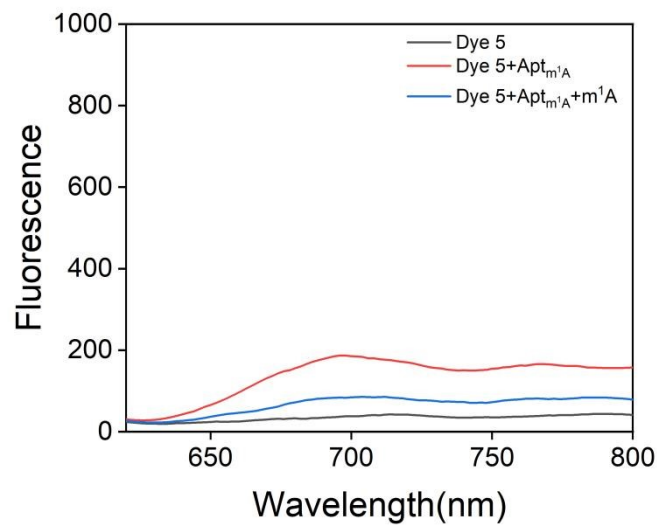

**Fig. S5** Fluorescence spectra of Basic Blue 26 (Ex: 585 nm / Em: 686 nm) binding to the Apt<sub>m<sup>1</sup>A</sub> and m<sup>1</sup>A competition in Tris buffer.

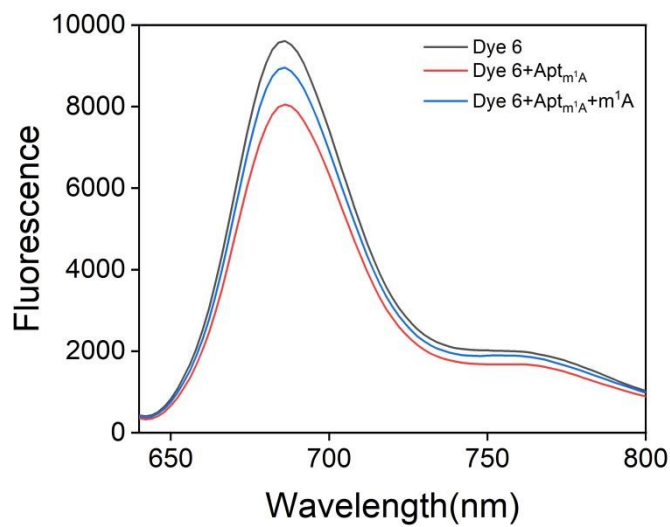

**Fig. S6** Fluorescence spectra of Basic Blue 11 (Ex: 600 nm / Em: 686 nm) binding to the Apt<sub>m<sup>1</sup>A</sub> and m<sup>1</sup>A competition in Tris buffer.

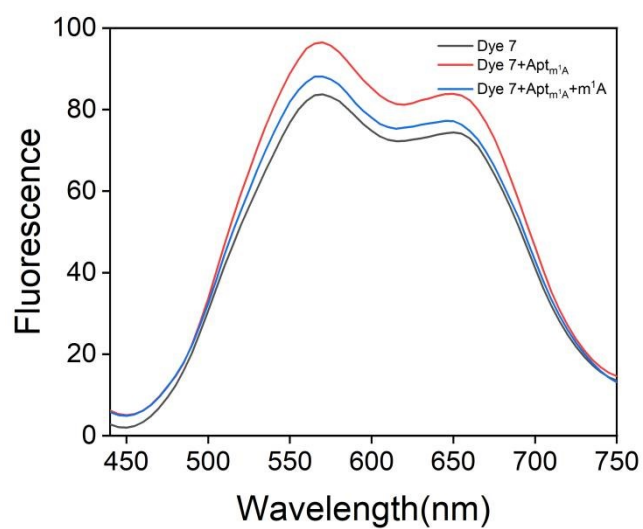

**Fig. S7** Fluorescence spectra of Basic Coumarin 6 (Ex: 400 nm / Em: 570 nm) binding to the Apt<sub>m<sup>1</sup>A</sub> and m<sup>1</sup>A competition in Tris buffer.

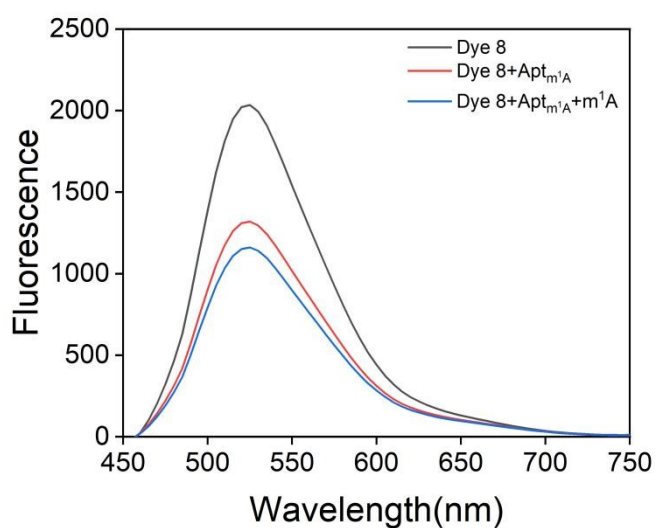

**Fig. S8** Fluorescence spectra of S2153 (Ex: 410 nm / Em: 530 nm) binding to the Apt<sub>m<sup>1</sup>A</sub> and m<sup>1</sup>A competition in Tris buffer.

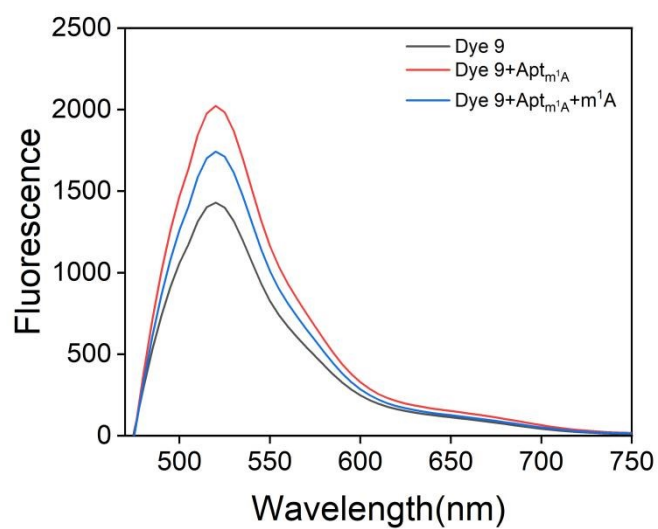

**Fig. S9** Fluorescence spectra of 3OUMARIN 525 (Ex: 430 nm / Em: 530 nm) binding to the Apt<sub>m<sup>1</sup>A</sub> and m<sup>1</sup>A competition in Tris buffer.

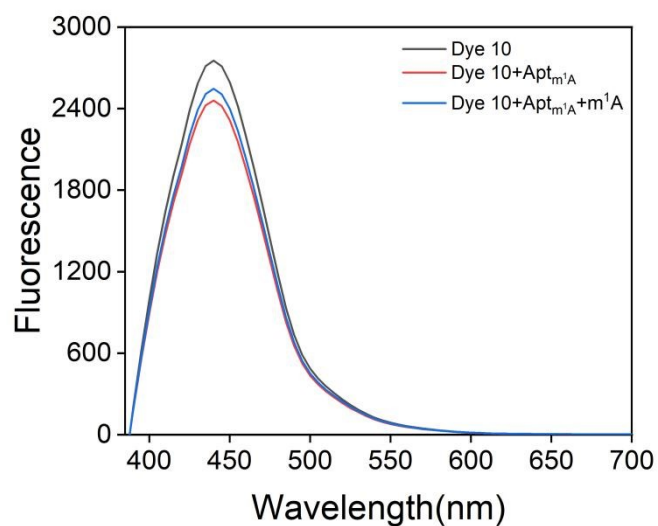

**Fig. S10** Fluorescence spectra of Coumarin 478 (Ex: 430 nm / Em: 530 nm) binding to the Apt<sub>m<sup>1</sup>A</sub> and m<sup>1</sup>A competition in Tris buffer.

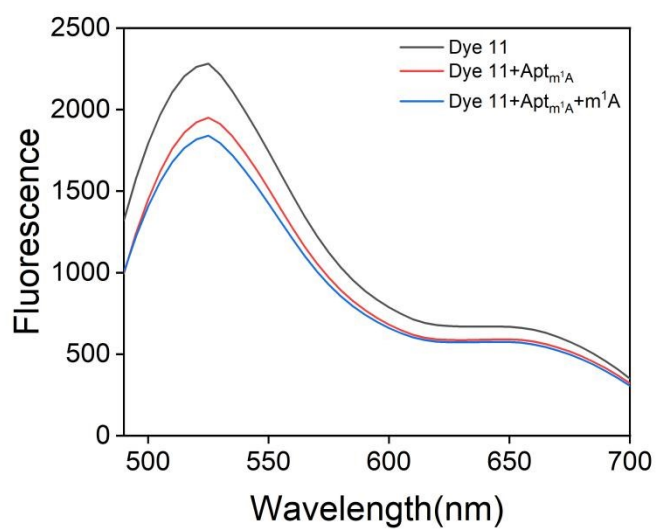

**Fig. S11** Fluorescence spectra of Exciton Coumarin 545 (Ex: 450 nm / Em: 520 nm) binding to the Apt<sub>m<sup>1</sup>A</sub> and m<sup>1</sup>A competition in Tris buffer.

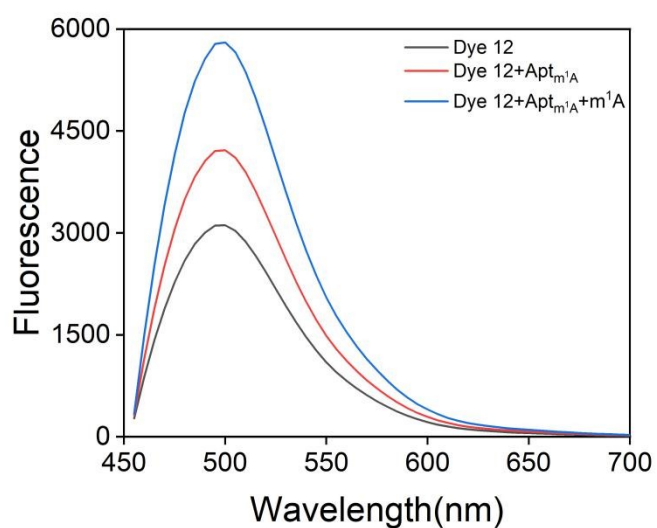

**Fig. S12** Fluorescence spectra of Coumarin 30 (Ex: 415 nm / Em: 500 nm) binding to the Apt<sub>m<sup>1</sup>A</sub> and m<sup>1</sup>A competition in Tris buffer.

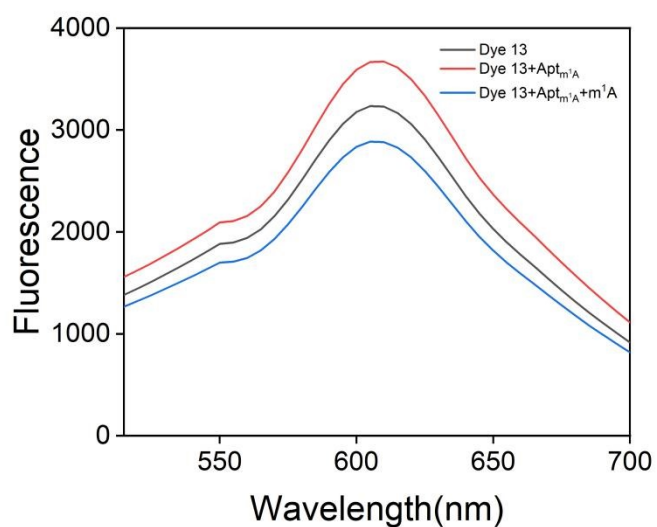

**Fig. S13** Fluorescence spectra of Coumarin 545T (Ex: 475 nm / Em: 605 nm) binding to the Apt<sub>m<sup>1</sup>A</sub> and m<sup>1</sup>A competition in Tris buffer.

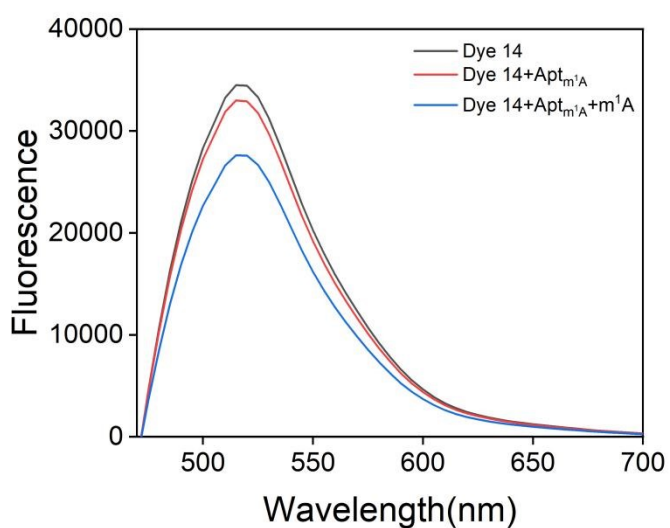

**Fig. S14** Fluorescence spectra of Coumarin 510 (Ex: 430 nm / Em: 520 nm) binding to the Apt<sub>m<sup>1</sup>A</sub> and m<sup>1</sup>A competition in Tris buffer.

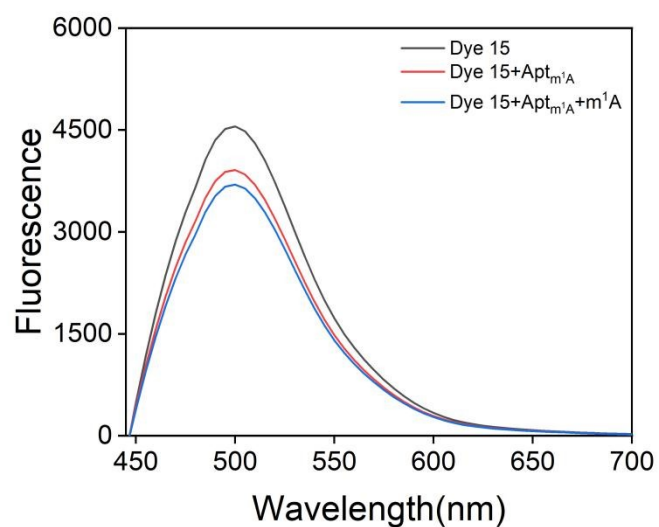

**Fig. S15** Fluorescence spectra of Coumarin 73 (Ex: 405 nm / Em: 515 nm) binding to the Apt<sub>m<sup>1</sup>A</sub> and m<sup>1</sup>A competition in Tris buffer.

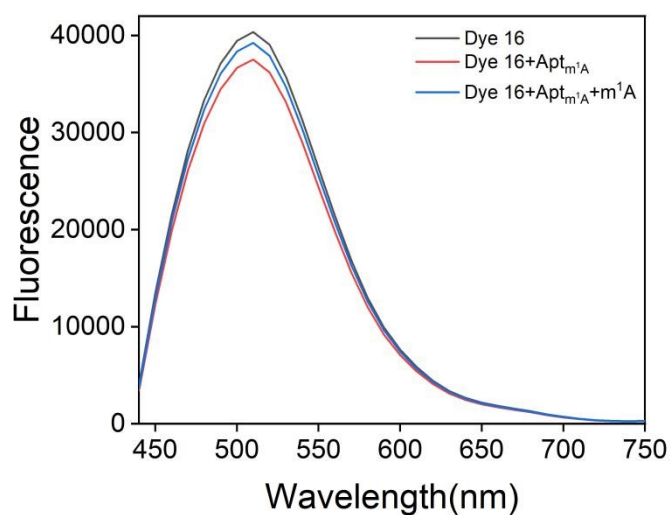

**Fig. S16** Fluorescence spectra of Coumarin 151 (Ex: 400 nm / Em: 500 nm) binding to the Apt<sub>m<sup>1</sup>A</sub> and m<sup>1</sup>A competition in Tris buffer.

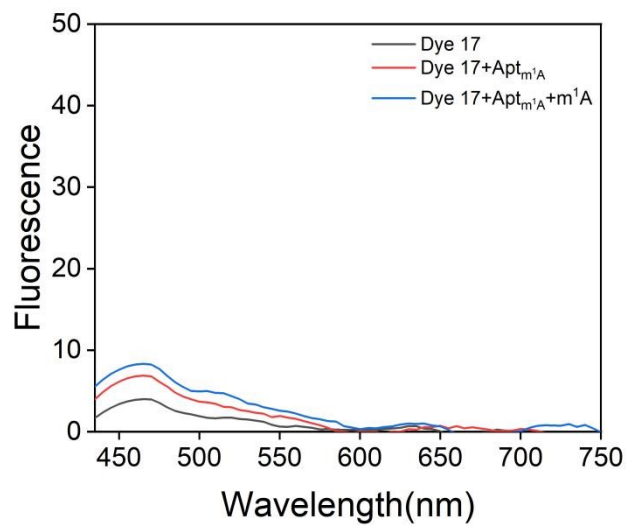

**Fig. S17** Fluorescence spectra of 3',6'-Dimethoxyfluoran (Ex: 395 nm / Em: 465 nm) binding to the Apt<sub>m<sup>1</sup>A</sub> and m<sup>1</sup>A competition in Tris buffer.

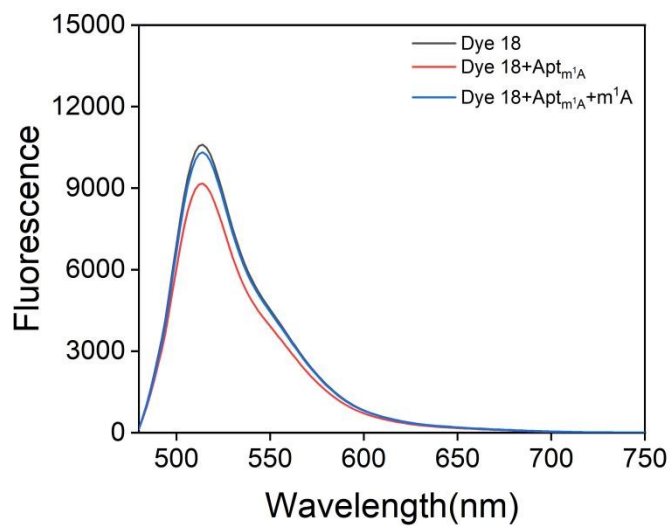

**Fig. S18** Fluorescence spectra of Fluorexon (Ex: 440 nm / Em: 520 nm) binding to the Apt<sub>m<sup>1</sup>A</sub> and m<sup>1</sup>A competition in Tris buffer.

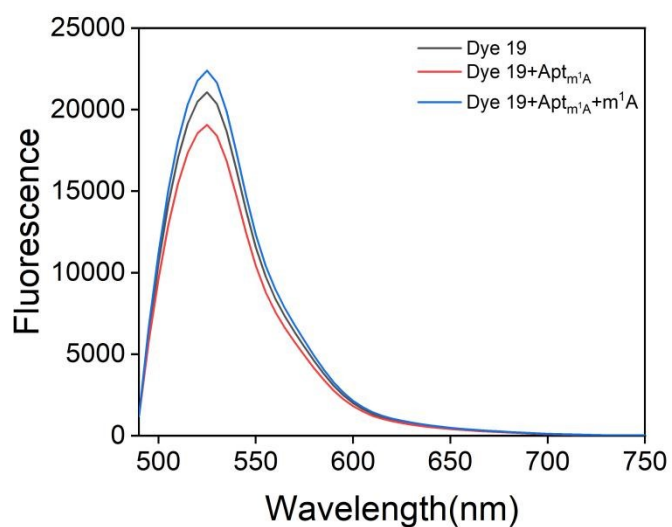

**Fig. S19** Fluorescence spectra of 6-Carboxyfluorescein (Ex: 450 nm / Em: 530 nm) binding to the Apt<sub>m<sup>1</sup>A</sub> and m<sup>1</sup>A competition in Tris buffer.

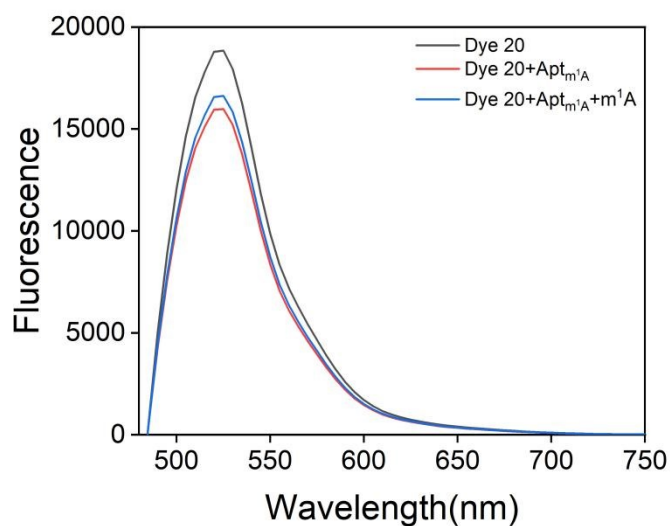

**Fig. S20** Fluorescence spectra of Fluorescein (Ex: 440 nm / Em: 530 nm) binding to the Apt<sub>m<sup>1</sup>A</sub> and m<sup>1</sup>A competition in Tris buffer.

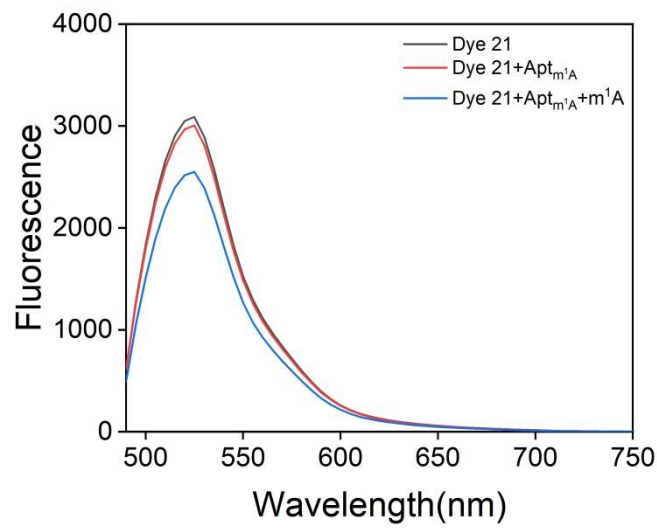

**Fig. S21** Fluorescence spectra of Fluorescein Sodium (Ex: 420 nm / Em: 530 nm) binding to the Apt<sub>m<sup>1</sup>A</sub> and m<sup>1</sup>A competition in Tris buffer.

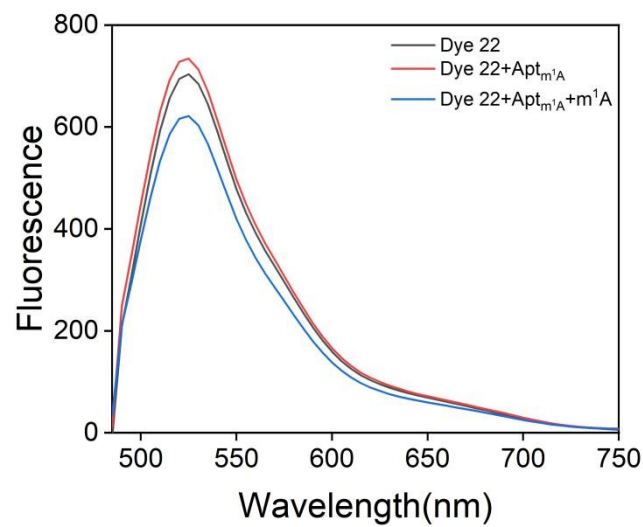

**Fig. S22** Fluorescence spectra of 3',6'-Dichlorofluoran (Ex: 410 nm / Em: 530 nm) binding to the Apt<sub>m<sup>1</sup>A</sub> and m<sup>1</sup>A competition in Tris buffer.

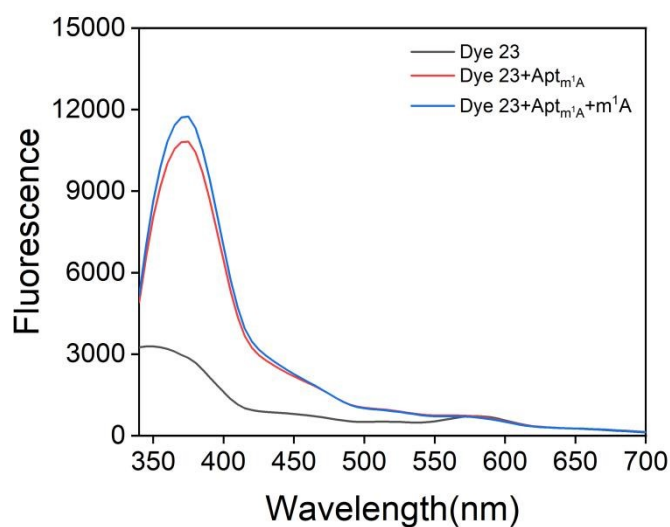

**Fig. S23** Fluorescence spectra of 2-(2-aminoethyl) Rhodamine B amide (Ex: 295 nm / Em: 375 nm) binding to the Apt<sub>m<sup>1</sup>A</sub> and m<sup>1</sup>A competition in Tris buffer.

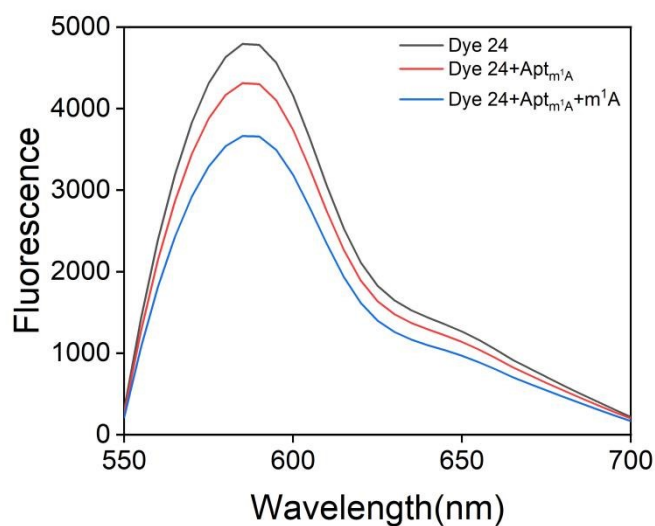

**Fig. S24** Fluorescence spectra of Sulforhodamine B (Ex: 510 nm / Em: 595nm) binding to the Apt<sub>m<sup>1</sup>A</sub> and m<sup>1</sup>A competition in Tris buffer.

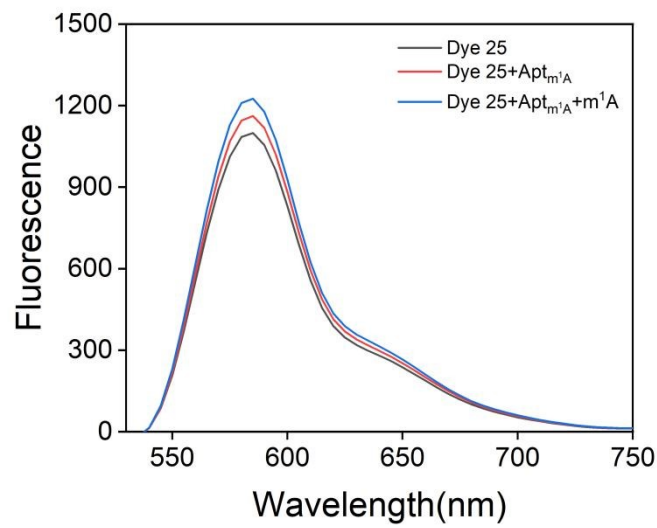

**Fig. S25** Fluorescence spectra of Rhodamine B (Ex: 420 nm / Em: 590 nm) binding to the Apt<sub>m<sup>1</sup>A</sub> and m<sup>1</sup>A competition in Tris buffer.

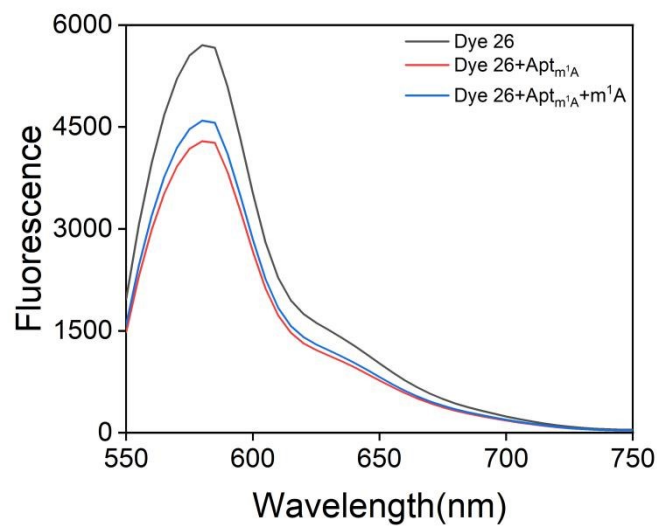

**Fig. S26** Fluorescence spectra of Pyronin B (Ex: 510 nm / Em: 580 nm) binding to the Apt<sub>m<sup>1</sup>A</sub> and m<sup>1</sup>A competition in Tris buffer.

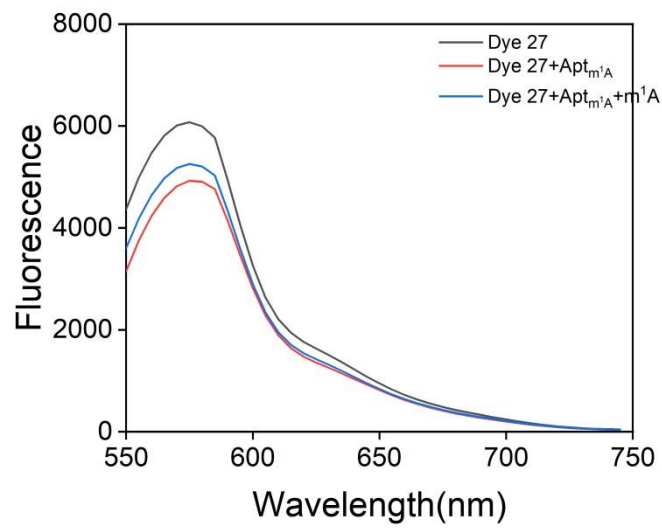

**Fig. S27** Fluorescence spectra of Pyronin Y (Ex: 510 nm / Em: 580 nm) binding to the Apt<sub>m<sup>1</sup>A</sub> and m<sup>1</sup>A competition in Tris buffer.

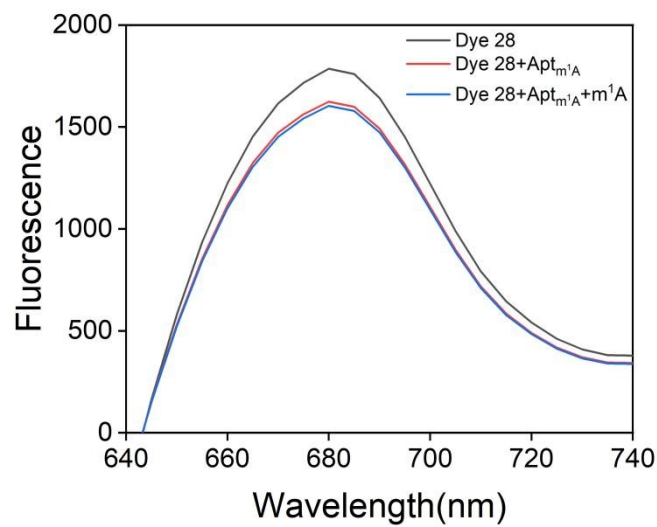

**Fig. S28** Fluorescence spectra of OXAZINE 1 (Ex: 600 nm / Em: 680 nm) binding to the Apt<sub>m<sup>1</sup>A</sub> and m<sup>1</sup>A competition in Tris buffer.

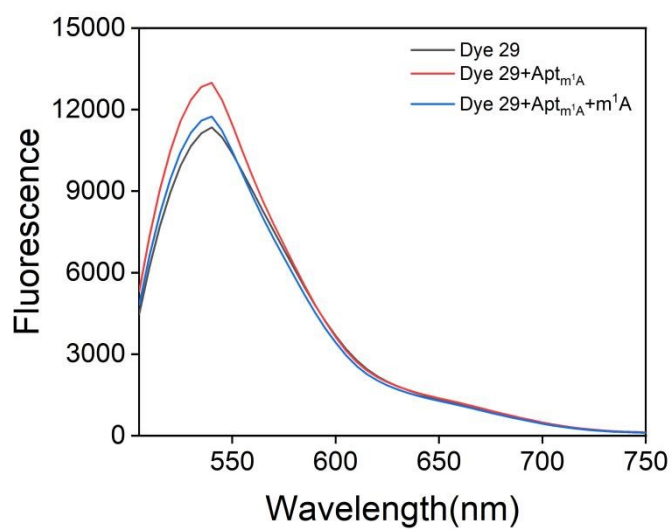

**Fig. S29** Fluorescence spectra of Basic Orange 14 (Ex: 465 nm / Em: 530 nm) binding to the Apt<sub>m<sup>1</sup>A</sub> and m<sup>1</sup>A competition in Tris buffer.

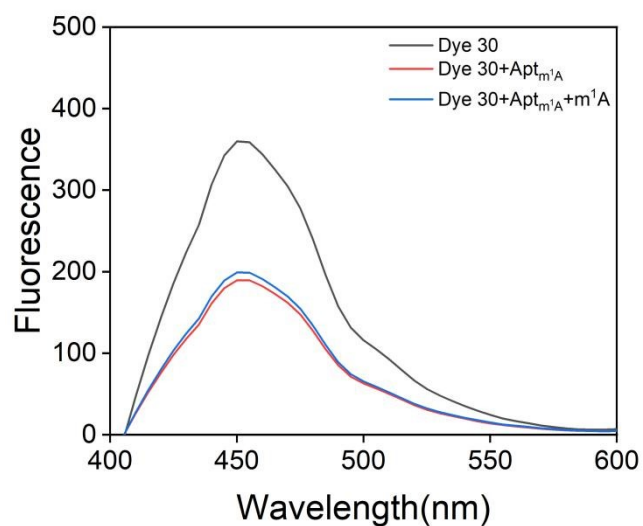

**Fig. S30** Fluorescence spectra of 9-Aminoacridine (Ex: 250 nm / Em: 460 nm) binding to the Apt<sub>m<sup>1</sup>A</sub> and m<sup>1</sup>A competition in Tris buffer.

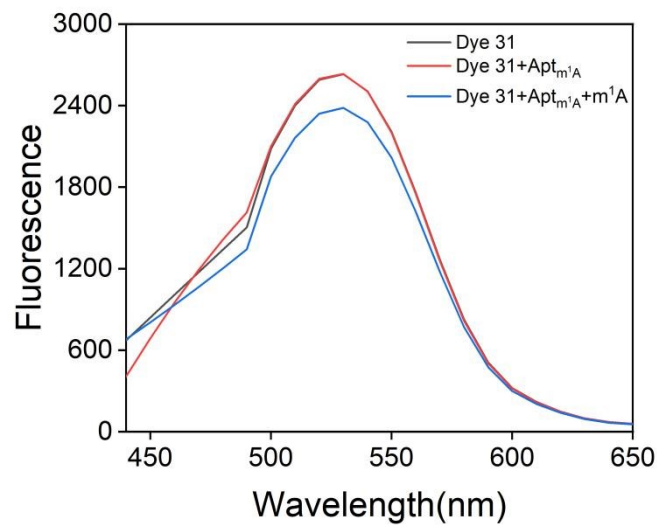

**Fig. S31** Fluorescence spectra of BODIPY(R) 493/503 (Ex: 380 nm / Em: 520 nm) binding to the Apt<sub>m</sub><sup>1</sup>A and m<sup>1</sup>A competition in Tris buffer.

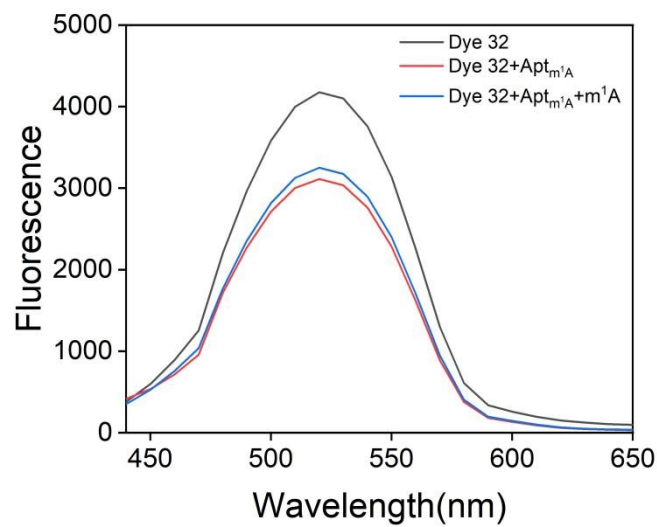

**Fig. S32** Fluorescence spectra of 8-Phenyl-BODIPY 505/515 (Ex: 360 nm / Em: 520 nm) binding to the Apt<sub>m</sub><sup>1</sup>A and m<sup>1</sup>A competition in Tris buffer.

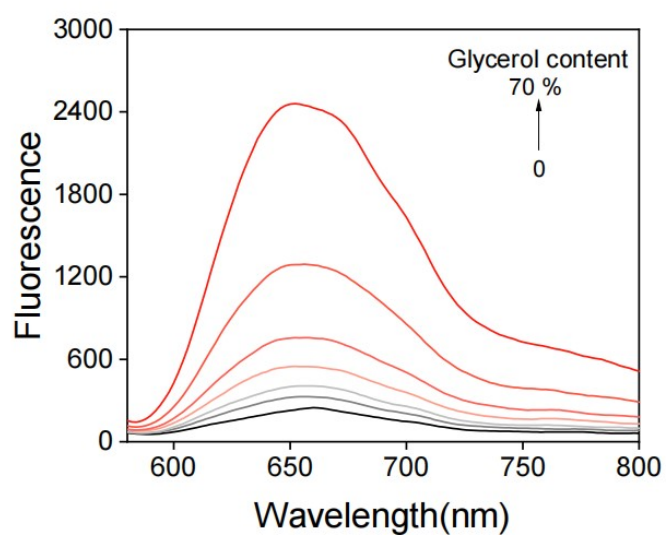

**Fig. S33** Fluorescence spectra of CV in a mixture of Tris buffer and glycerol.

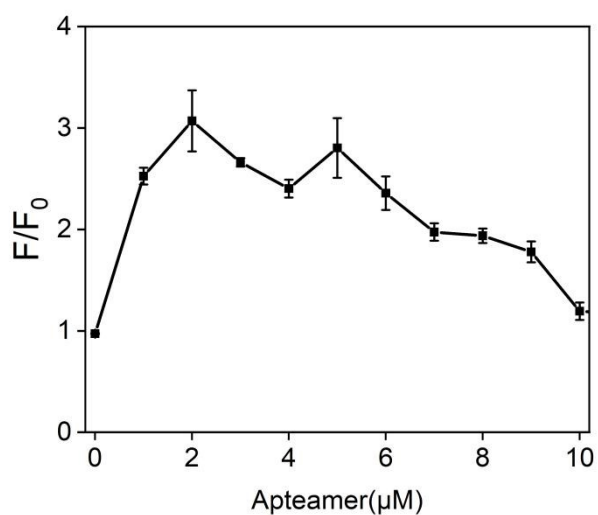

**Fig. S34** The fluorescence intensity of mixtures containing CV at 10  $\mu\text{M}$  bound to different concentrations of aptamers, relative to the fluorescence of the same mixture supplemented with  $m^1A$  (10  $\mu\text{M}$ ).

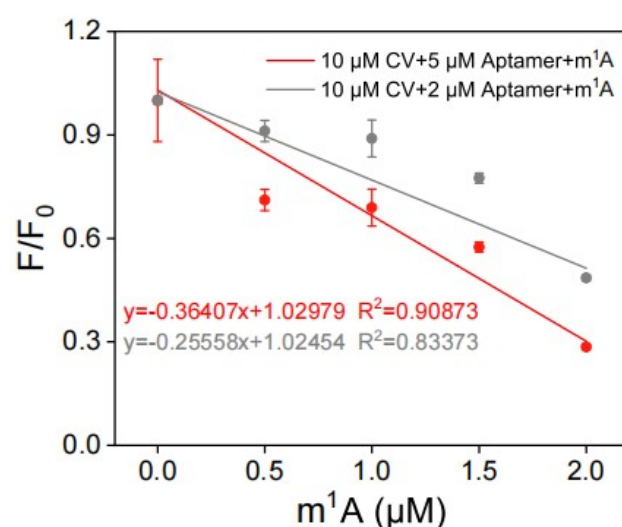

**Fig. S35** Linear response in the concentration range of 0–2  $\mu\text{M}$  at different aptamer concentrations.

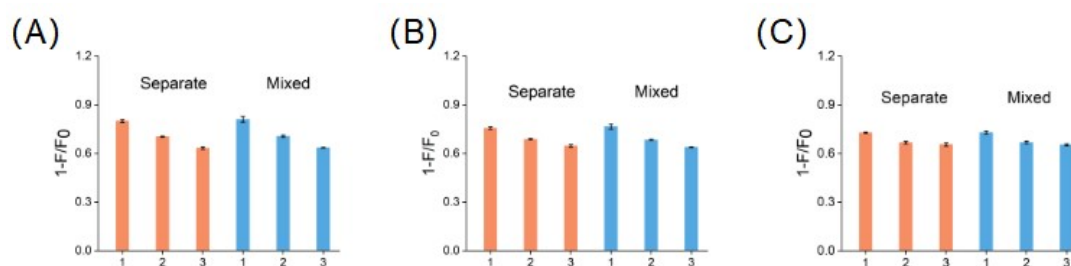

**Figure S36.** Storage stability of CV, Apt<sub>m<sup>1</sup>A</sub>, and the CV-Apt<sub>m<sup>1</sup>A</sub> complex for m<sup>1</sup>A sensing after storage -20 °C (A), 4 °C (B), and 25 °C (C) for 1, 2 and 3 days. In the “separate” mode, CV and Apt<sub>m<sup>1</sup>A</sub> were stored independently and mixed before testing; In the “mixed” mode, the pre-formed complex was stored prior to measurement.

| Sample      | Added ( $\mu\text{M}$ ) | Found ( $\mu\text{M}$ ) | Recovery (%) |
|-------------|-------------------------|-------------------------|--------------|
| human urine | 0.4                     | 0.356                   | 89.1         |
|             | 0.6                     | 0.606                   | 101.1        |
|             | 0.6                     | 0.684                   | 85.5         |
|             | 1.0                     | 1.095                   | 109.5        |

**Table S1.** The application of sensing method to spiked human urine samples.

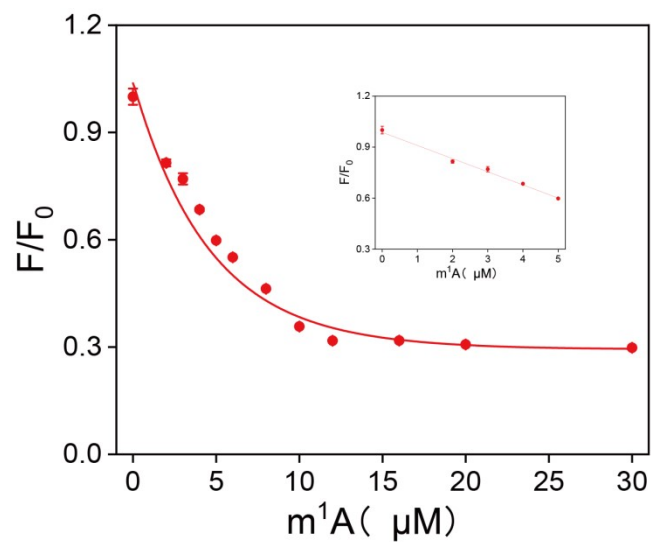

**Fig. S37** Fluorescence intensity of CV-Apt<sub>m<sup>1</sup>A</sub> complexes measured by POCT device at different m<sup>1</sup>A concentrations.

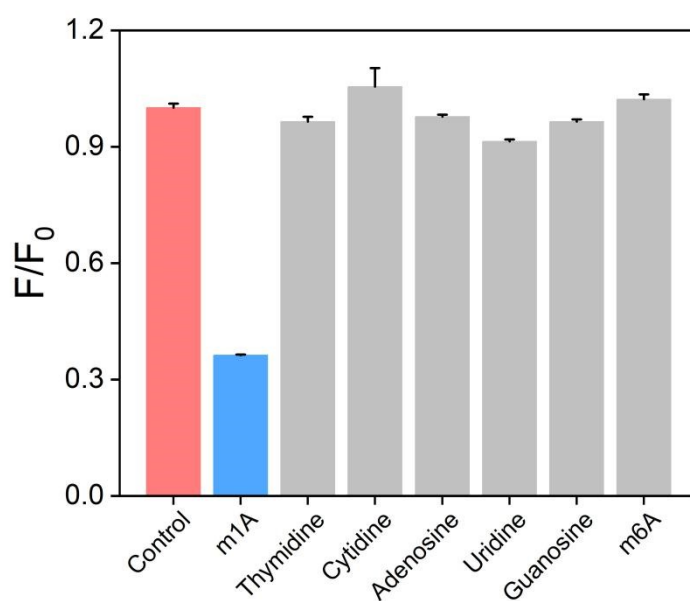

**Fig. S38** Selectivity of CV-Apt<sub>m<sup>1</sup>A</sub> complexes for m<sup>1</sup>A measured by POCT device.
